# Supplementary material
Source: PubMed Central journal article supplement (PMC6716526)
Supplement: NIHMS1538147-supplement-1.pdf [file NIHMS1538147-supplement-1.pdf]

Cell Reports, Volume 28

## Supplemental Information

### Orchestration of Processing Body Dynamics and mRNA Decay in *Arabidopsis* Immunity

Xiao Yu, Bo Li, Geng-Jen Jang, Shan Jiang, Daohong Jiang, Jyan-Chyun Jang, Shu-Hsing Wu, Libo Shan, and Ping He

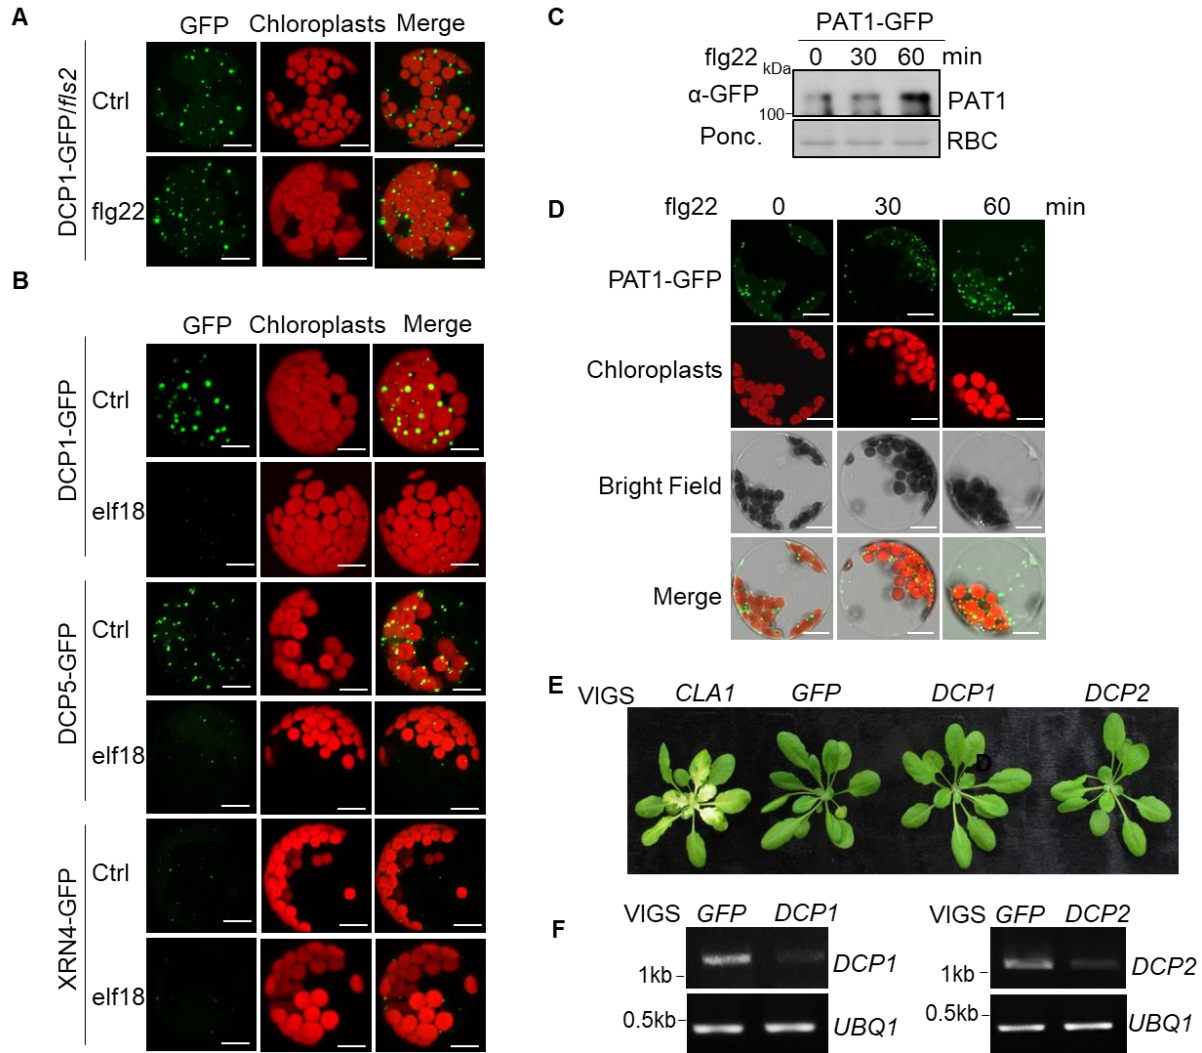

**Figure S1. P-body dynamics in plant immunity.** Related to Fig 1.

(A) flg22-induced P-body disassembly is blocked in the *fls2* mutant. Protoplasts isolated from *fls2* expressing *DCP1-GFP* were treated with or without 100 nM flg22 for 30 min. Autofluorescence of chloroplasts is shown in the second column. Bar=10  $\mu$ m. (B) Treatment with elf18 triggers P-body disassembly. Protoplasts expressing *DCP1-GFP*, *DCP5-GFP*, or *XRN4-GFP* were treated with or without 100 nM elf18 for 30 min. Bar=10  $\mu$ m. (C) flg22 treatment induces PAT1-GFP protein accumulation. Protoplasts expressing *PAT1-GFP* were treated with or without 100 nM flg22 for 30 min and 60 min. Protein expression was analyzed with an  $\alpha$ -GFP immunoblot. (D) Confocal microscopy with protoplast expressing *PAT1-GFP* treated with or without 100 nM flg22 for 30 min and 60 min. Bar=10  $\mu$ m. (E) Silencing of *DCP1* or *DCP2* by VIGS does not affect plant growth. Two-week-old soil-grown Col-0 plants were infiltrated with *Agrobacterium* carrying different VIGS vectors and plants were photographed after another 2 weeks. Plants silenced with *CLA1* were used as a visual marker for VIGS efficiency, and plants inoculated with *VIGS-GFP* vector were used as a control. (F) VIGS efficiency of *DCP1* and *DCP2*-silenced plants by RT-PCR analysis. Samples were collected two weeks after inoculation with *Agrobacterium*. Full-length *DCP1* and *DCP2* were amplified and *UBQ1* was used as an internal control. The above experiments were repeated three times with similar results.

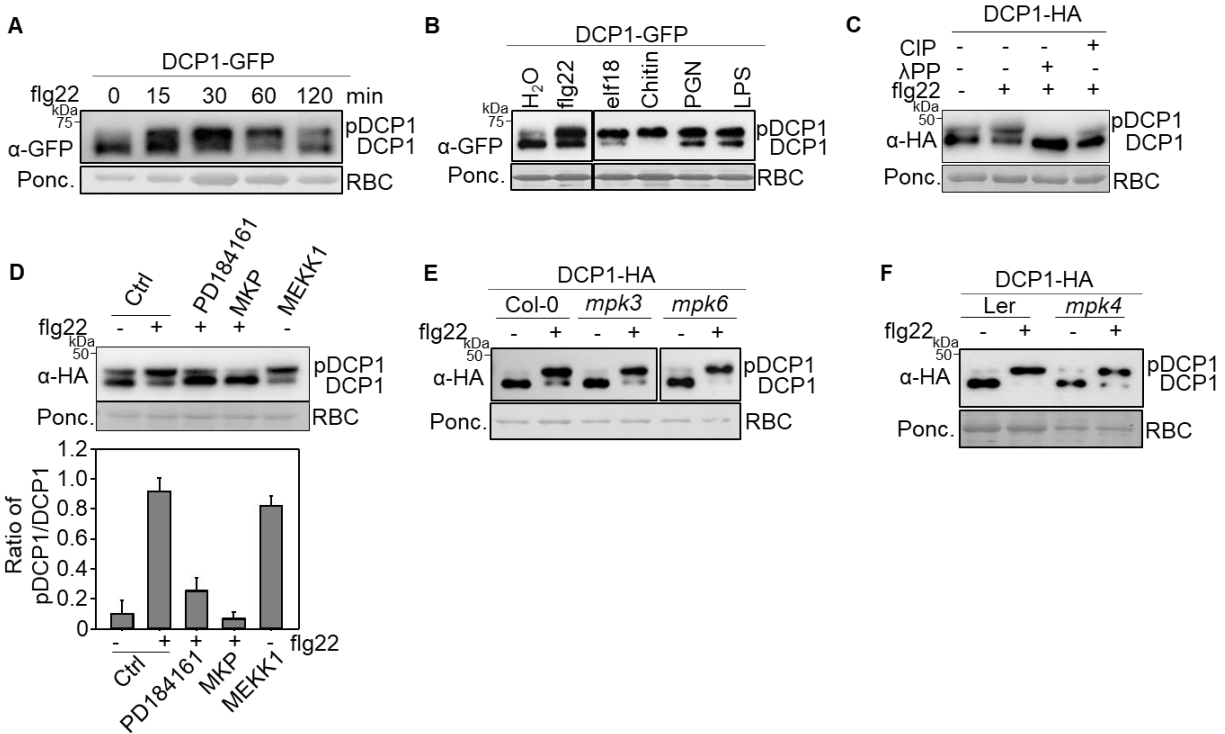

**Figure S2. MAMPs induce MAPK-mediated DCP1 phosphorylation.** Related to Fig 3.

(A) flg22 treatment induces DCP1 mobility shift in *35S::DCP1-GFP* transgenic plants. Ten-day-old seedlings were treated with 100 nM flg22 for indicated times. Protein loading is shown by Ponceau S staining for RuBisCo (RBC). (B) Different MAMPs induce DCP1 mobility shift in *35S::DCP1-GFP* transgenic plants. Ten-day-old seedlings were treated with 100 nM flg22, 100 nM elf18, 50 µg/mL chitin, 50 µg/mL PGN or 50 µg/mL LPS for 15 min. (C) Protein phosphatase (CIP or λPP) treatment removes DCP1 mobility shift. Protoplasts expressing *DCP1-HA* were lysed and treated with CIP at 37°C for 1 hr or λPP at 30°C for 1 hr. (D) Phosphorylation of DCP1 is dependent on the MAPK cascade. Protoplasts expressing *DCP1-HA* were treated with 7.5 µM PD184161 for 1 hr before 100 nM flg22 treatment for 15 min (third lane). For the last two lanes, protoplasts were co-expressed with *DCP1-HA* and *MKP* or *MEKK1*. The intensity of the phosphorylated and un-phosphorylated bands was quantified by ImageJ software, and the ratio of shifted to the total protein is shown as a bar graph. (E) & (F) The *mpk3*, *mpk6* or *mpk4* single mutant does not affect flg22-induced DCP1 phosphorylation. The *mpk3* and *mpk6* mutants are in the Col-0 background (E) and *mpk4* is in the Ler background (F). Protoplasts expressing *DCP1-HA* were treated with 100 nM flg22 for 15 min. The above experiments were repeated three times with similar results.

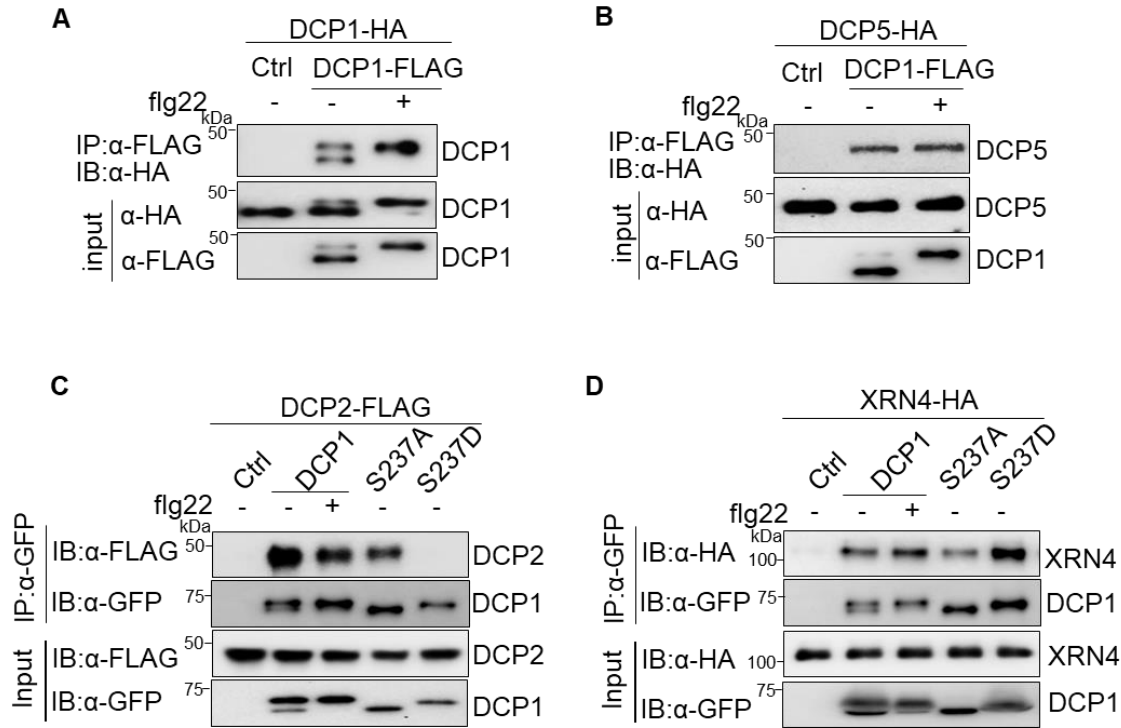

**Figure S3. Dynamic interactions of DCP1 with DCP2 and XRN4.** Related to Fig 4.

(A) DCP1 homomerizes before and after flg22 treatment. Protoplasts expressing *DCP1-HA* and *DCP1-FLAG* were treated with 100 nM flg22 for 15min, and resulting protein extracts were subjected to IP with α-FLAG (IP: α-FLAG) and IB with α-GFP (top panel). The input control is shown on the bottom two panels. (B) DCP1 dimerizes with DCP5 before and after flg22 treatment in *Arabidopsis* protoplasts. The input control is shown on the bottom two panels. (C) DCP1<sup>S237A</sup> shows higher affinity with DCP2 than DCP1<sup>S237D</sup> in *N. benthamiana*. *Agrobacterium* carrying 35S::*DCP2-FLAG* was co-infiltrated with *Agrobacterium* carrying 35S::*DCP1-GFP*, 35S::*DCP1<sup>S237A</sup>-GFP*, 35S::*DCP1<sup>S237D</sup>-GFP* or an empty vector (Ctrl.) into *N. benthamiana* leaves. For flg22 treatment, 500 nM flg22 was infiltrated at 30 min before harvesting samples. Co-IP was performed with α-GFP (IP: α-GFP), and the proteins were analyzed by IB with α-FLAG and α-GFP (top two panels). The input control is shown on the bottom two panels. (D) DCP1<sup>S237D</sup> shows higher affinity with XRN4 than DCP1<sup>S237A</sup> in *N. benthamiana*. The experiment was carried out as described in (C). The above experiments were repeated three times with similar results.

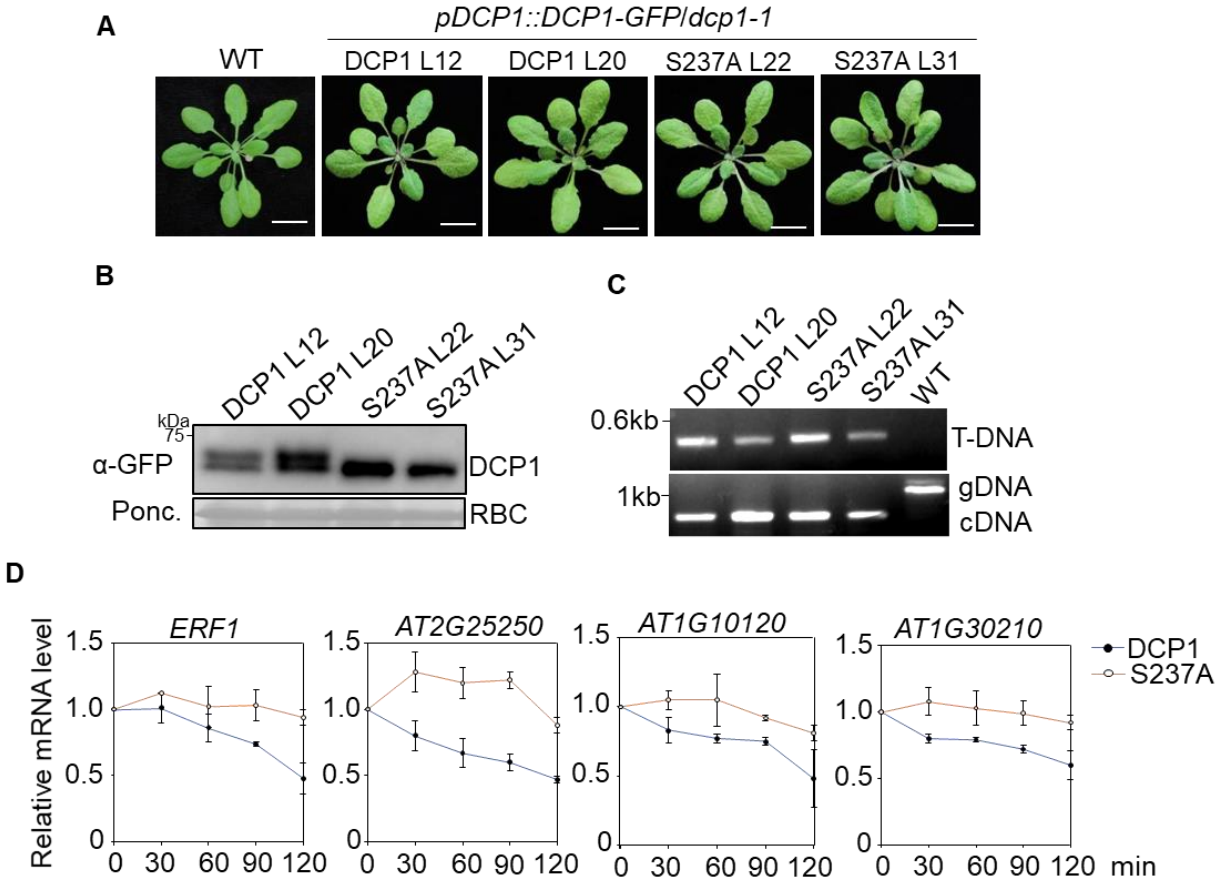

**Figure S4. Analysis of DCP1 complementation lines.** Related to Fig 5.

(A) Plant growth phenotype of DCP1 complementation lines in *dcp1-1*. Four-week-old soil-grown WT Col-0, *pDCP1::DCP1-GFP/dcp1-1* and *pDCP1::DCP1<sup>S237A</sup>-GFP/dcp1-1* plants were photographed. Bar=1cm. (B) Protein expression levels of transgenic plants. Immunoblotting was carried out with an  $\alpha$ -GFP antibody and protein loading is shown by RuBisCo (RBC) with ponceau S staining. (C) PCR confirmation of transgenic plant genotypes. The primer pair of GABI\_LB and *dcp1-1*\_RP amplified the T-DNA insertion (top panel) and the primer pair of *dcp1-1*\_LP and *dcp1-1*\_RP amplified both the genomic DNA and cDNA fragments of DCP1 (bottom panel). (D) mRNA decay of XRN4 target genes in *pDCP1::DCP1-GFP/dcp1-1* and *pDCP1::DCP1<sup>S237A</sup>-GFP/dcp1-1* plants. Ten-day-old seedlings were pre-treated with cordycepin for 30 min and samples were harvested at the indicated times for qRT-PCR analysis. Data are shown as means  $\pm$  SD from two biological repeats.

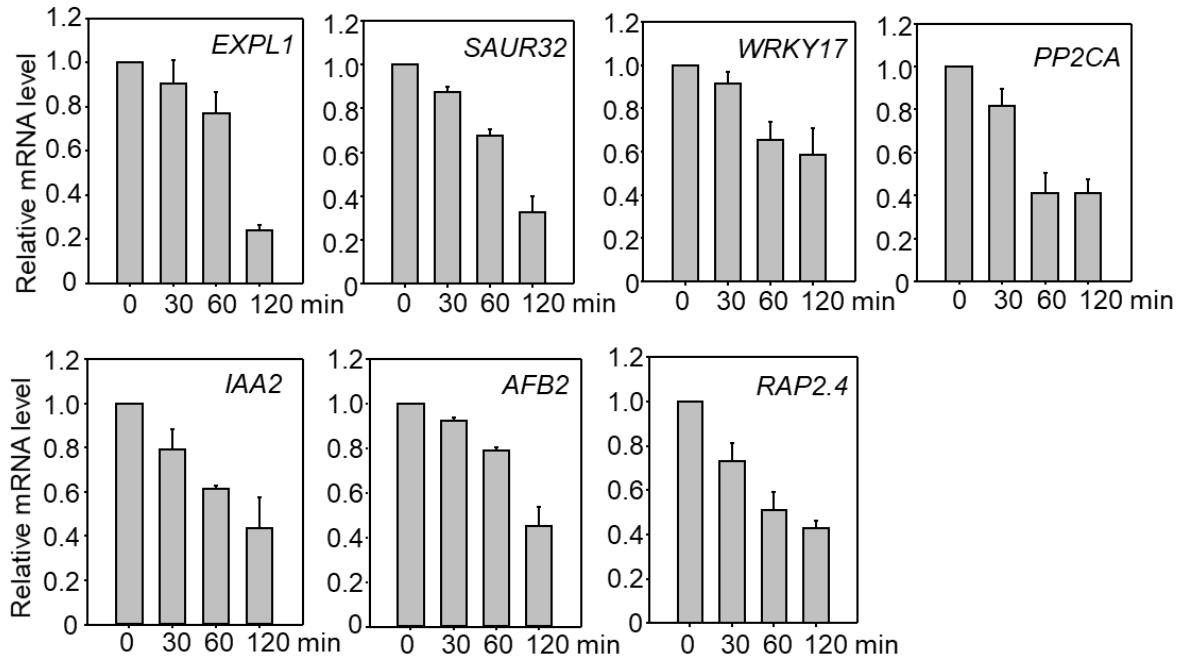

**Figure S5. Screen of unstable mRNAs.** Related to Fig 6.

Ten-day-old WT Col-0 seedlings were treated with transcription inhibitor cordycepin at 150  $\mu\text{g/ml}$  for 30 min and harvested at the indicated time points. The relative mRNA levels at different time points are shown as the ratio to the mRNA level at 0 min (right after cordycepin treatment), which is set as 1. *ACTIN2* was used as an internal control. Data are shown as means  $\pm$  SD from two biological replicates.

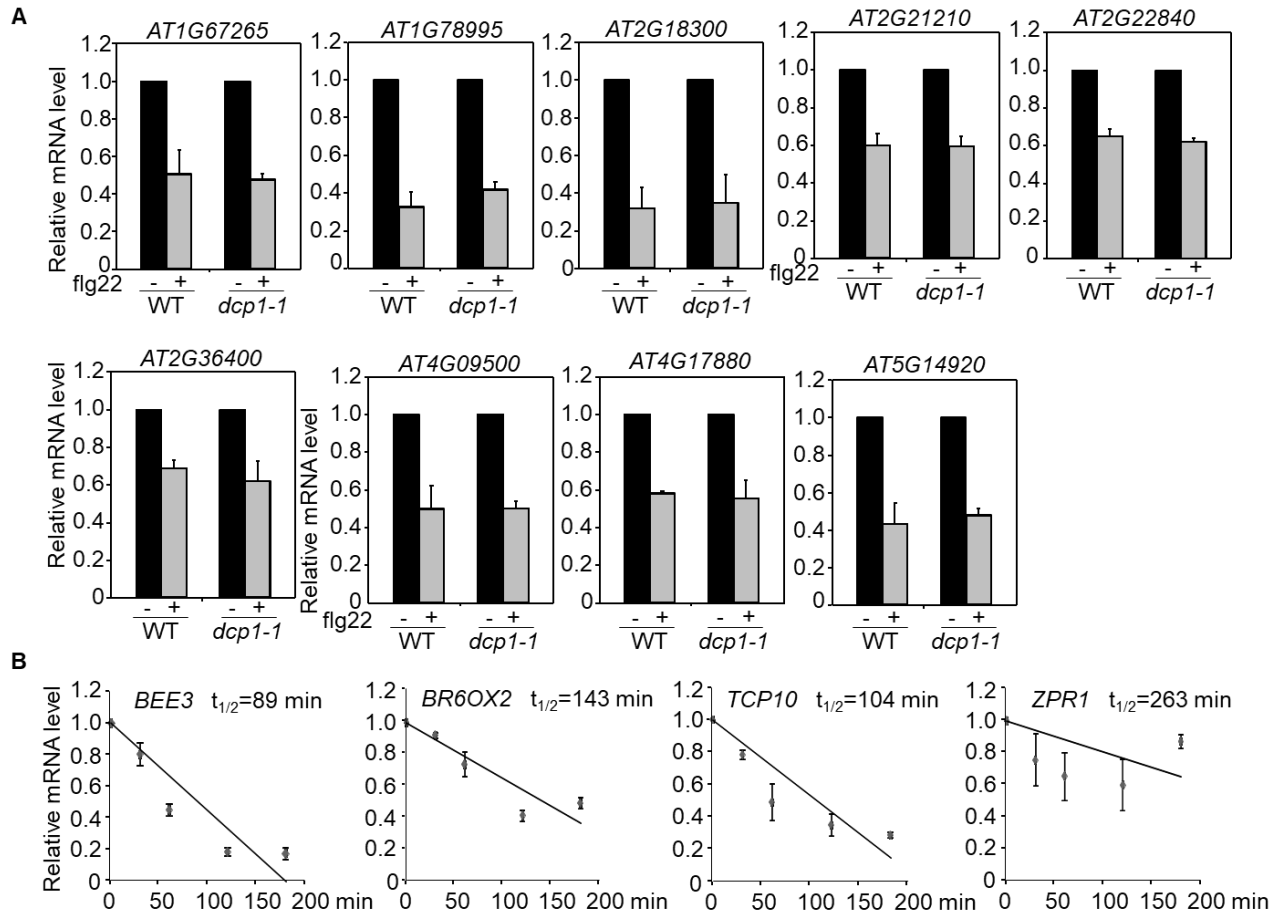

**Figure S6. DCP1-independent flg22-downregulated genes.** Related to Fig 6.

(A) Ten-day-old WT Col-0 and *dcp1-1* seedlings were treated with 100 nM flg22 for 60 min and subjected to qRT-PCR analysis. Gene expression level was normalized with *ACTIN2*. Data are shown as means  $\pm$  SD from three biological replicates. (B) mRNA half-lives of DCP1-dependent flg22-downregulated genes. Ten-day-old WT Col-0 seedlings were pre-treated with 150  $\mu$ g/ml cordycepin for 30 min and harvested at 0, 30, 60, 120 and 180 min for qRT-PCR analysis. *ACTIN2* was used as an internal control. Data are shown as means  $\pm$  SD from two independent biological repeats. The percentages of mRNAs at each time point calculated relative to the zero time point value were plotted against time and a regression curve was obtained.

**Table S1. Primers used in this study.** Related to STAR Methods.**Cloning, point mutation and VIGS primers**

| Gene                   | Forward primer                         | Reverse primer                        |
|------------------------|----------------------------------------|---------------------------------------|
| <i>DCP1</i>            | CGGGATCCATGTCTCAAACGGGAAGA<br>TAATCCC  | TCCCCCGGGTTGTTGAAGTGCATTTTG<br>TAAAG  |
| <i>DCP2</i>            | CGGGATCCATGTCGGGCCTCCATCG<br>ATCATC    | GAAGGCCTAGCTGAATTACCAGATTCC           |
| <i>DCP5</i>            | GGACTAGTATGGCGGCTGATAATAC G<br>GG      | TCCCCCGGGGTAGTACGATTTGATAC<br>GCC     |
| <i>XRN4</i>            | CGGGATCCATGGGAGTACCGGCGTT<br>CTAC      | GAAGGCCTCAAGTTTGCACCTCGATGA<br>CTTG   |
| <i>pDCP1</i>           | GCTCTAGAGCTTCACCTACTTAAAATTG<br>G      | CGGGATCCCTTTTATAAATCAAAGATCAG         |
| <i>DCP1-<br/>VIGS</i>  | CGGAATTCCTCAATGGAGTCGTAAGG             | GGGGTACCGACCCACTCGCAGTGTTCC           |
| <i>DCP2-<br/>VIGS</i>  | CGGAATTCGTCGGGCCTCCATCGATC             | GGGGTACCGCACAAGCATGGTCTTC             |
| <i>DCP1-<br/>S237A</i> | CCTCCACAGATACAAGCACCACCGCCTC<br>TACAA  | TTGTAGAGGCGGTGGTGTCTGTATCTGTGG<br>AGG |
| <i>DCP1-<br/>S237D</i> | CCTCCACAGATACAAGACGCACCGCCT<br>VCTACAA | TTGTAGAGGCGGTGGGTCTTGTATCTGTGG<br>AGG |
| <i>PAT1</i>            | CGGGATCCATGGACGCTTTTGGAAATCGG          | TCCCCCGGGACTTAATACTGGCTCGGTTTT<br>C   |

The restriction enzymes are underlined.

**Genotyping and RT-PCR primers**

| Primer           | sequence                          |
|------------------|-----------------------------------|
| <i>dcp1-1_LP</i> | TTAACCAGAAGCCAAAGGCC              |
| <i>dcp1-1_RP</i> | TGTTGAAGTG CATTTTGTAAAG           |
| <i>GABI_LB</i>   | TAATAACGCTGCGGACATCTACA           |
| <i>DCP1-F</i>    | CGGGATCCATGTCTCAAACGGGAAGATAATCCC |
| <i>DCP1-R</i>    | TCCCCCGGGTTGTTGAAGTGCATTTTG TAAAG |
| <i>DCP2-F</i>    | CGGGATCCATGTCGGGCCTCCATCG ATCATC  |
| <i>DCP2-R</i>    | GAAGGCCTAGCTGAATTACCAGATTCC       |
| <i>UBQ1_FP</i>   | ACCGGCAAGACCATCACTCT              |
| <i>UBQ1_RP</i>   | AGGCCTCAACTGGTTGCTGT              |

**qRT-PCR primers**

| Gene                    | Forward primer         | Reverse primer        |
|-------------------------|------------------------|-----------------------|
| <i>FRK1</i>             | ATCTTCGCTTGGAGCTTCTC   | TGCAGCGCAAGGACTAGAG   |
| <i>WRKY30</i>           | GCAGCTTGAGAGCAAGAATG   | AGCCAAATTTCCAAGAGGAT  |
| <i>At1g07160/PP2C</i>   | CGTGTTGGGGATTGATTCCG   | AGAGCTCGGGCGGTTATG    |
| <i>ACTIN2</i>           | GCACCCTGTTCTTCTTACGGA  | GTGAGACACACCATCACCAGA |
| <i>At3g45970/EXPL1</i>  | TTATTTCTCCTCTGCCTCTGC  | GCCAGCACCGTCTTTGTAG   |
| <i>At2g46690/SAUR32</i> | CCTTGTCACGTGGAGGAGTT   | TCAAGCTCTGAAGCATCCAA  |
| <i>At2g24570/WRKY17</i> | TGAACATGACCACTCTGAAGGC | ACTTACCGCCGGTACTCTCAC |
| <i>At3g11410/PP2CA</i>  | CGTAACGGTGTAGCCATTCC   | GGCAAGAACTCCAAGAACCC  |
| <i>At3g23030/IAA2</i>   | AAGAAGAATCTACACCTCCTAC | GCTCGGGGTAGTTTTTGTATG |
| <i>At3g26810/AFB2</i>   | GGCGGCGCATCCATTCTTGTC  | AGATGCTCTCCATAGCCTTTC |



|                         |                        |                       |
|-------------------------|------------------------|-----------------------|
| <i>At1g78080/RAP2.4</i> | TTGGTGATACGGAGGAGGAG   | GAAGAATCGAATCCCAATCG  |
| <i>At1g53830/PME2</i>   | ATTGAAGGGTCAGGTACACG   | CGGTTGTTGTTGTTGGTGAA  |
| <i>At1g73830/BEE3</i>   | CCGGATGTTATAAGACAATGG  | CACAGCATCAGTCTCCGAGT  |
| <i>At2g01850/XTH27</i>  | TGCTTTATCGGAGTGTGTGG   | ATCGACTCGGTTCCATCAAC  |
| <i>At2g31070/TCP10</i>  | ATCAACCGTCGATGATGACA   | GATCCCAAGAACGAAACGAA  |
| <i>At2g45450/ZPR1</i>   | TTTTCAGACACACCCACGAG   | TTTTCTCTTCCCGCCACAT   |
| <i>At3g30180/BR60X2</i> | ACTCGAGCTGTGATCTTTGAG  | TTCTCCAACCTTTTGGGATT  |
| <i>At1g67265/RTGL21</i> | GGTACCAAGAAGAAGACGCC   | GCCAACAAATGAGCATGACC  |
| <i>At1g78995</i>        | CGATCTGCGGCTGTTTCGTATA | CCTGACAGCGTTTGC GGTA  |
| <i>At2g18300/HBI1</i>   | AACCCGGAAGTAGAGCTTGC   | ATCCTTGCTGGTCTAACGGA  |
| <i>At2g21210/SAUR</i>   | AAGGACACCTTGCGGTTTAC   | ATAGTGAGGCCACCCATTGG  |
| <i>At2g22840/GRF1</i>   | AAGAAATGGCGGTGCTCG     | GGCAGCATTAGTATTGTGGC  |
| <i>At2g36400/GRF3</i>   | ACCGTTCAAGAAAGCCTGTG   | GTTGCTGTTGTAGTGGTGGC  |
| <i>At4g09500</i>        | TGGTCCAATGTTCCCTGAG    | AAACACTACTGACTTCGGCG  |
| <i>At4g17880/MYC4</i>   | AATCGAAGGAGCAAACGAGA   | CCATCTCCCAACCTAACAA   |
| <i>At5g14920</i>        | CACGCTGCCAACTACTCCTA   | CGGTAGTTTGTATCGGAGGAG |
| <i>AT2G25250</i>        | GGCTTTGTTTTACGCTGGTC   | TAGCGAAGAAAGCCGGTAAA  |
| <i>AT1G10120</i>        | AAGCCGAATCACAATGGAAC   | TTCCCCTTTGAGGGTCTTCT  |
| <i>AT1G30210</i>        | CGTGGGAAAGCAAGAGAGAG   | TTGGTCAAACCACCAGTGA   |
| <i>AT3G23240/ERF1</i>   | AGGATGGTTGTTCTCCGGTT   | AGACCCCAAAAGCTCCTCAA  |
